# Supplementary material
Source: PubMed Central journal article supplement (PMC1201586)
Supplement: pnas_0503846102_1.pdf [file pnas_0503846102_1.pdf]

human -----MEDGV 5  
sheep -----  
cow -----  
dog -----  
mouse -----MEDGV 5  
rat -----  
frog -----MEKAF 5  
zebrafish -----  
honeybee -----MEKKHGSDVVEDEELEESE 19  
fly MSDAAKSNNNASADAPDPTTPDATGEADAANAATPTTPRGNHNNNSANGRSKNKIKSTQ 60  
worm -----  
yeast -----

human AGPQLGAAAEAAEAARARPGVTLRFPAPLPGAAEADEGGG-DWSFIDCEMEEVDLQDL 64  
sheep -----MHFRNFNYS 9  
cow -----MPAPS-----MDCD-- 9  
dog -----MLRDTMKSWNDSQSDLCSSDQEEEEEEMVFGENEDDLEEMDFSDL 45  
mouse AGPRLG---EVAEAVEARAPRRVTLRFPAPFSAAAEGDGGGGGWSFIDCEMEEVDLQDL 62  
rat -----MHFRDFNYS 9  
frog R-----DLAAQIGAAAAESPPTANDWDFLDIDMESIDLRL 41  
zebrafish -----MREGKLSRNSSEGHSSDPEEDEEEMAFGDTEDDYEEEMDFSDL 44  
honeybee N-----IINEVDGLPNLHPNYQQLELEFDIEKRSDDRISIEDLVRDEDL 64  
fly NSSGGGSIDKLSPDQDIFINAADGLPNQHP---SLPKEGVD---SDTEPEVDADSFDDL 114  
worm -----MVADNSEKSTKSVANGSLISTVSSKDDL 28  
yeast -----MGNIIITDTIITS 13

exon 5

human PSATIACHLDPRVFDGLCRAKFESLFRTYDKDITFQYFKSFKRVRINFSNPFSAADARL 124  
sheep FSSLIACVANS EIFSETRAKFESLFRTYDKDITFQYFKSFKRVRINFSNPLSAADARL 69  
cow ASTLVACVDFVEVFTNQEVKEKFEGLFRTYDDCVTFQLFKSFRVRINFSNPKSAARARI 69  
dog PTLFACSVHEAVFVEQEQERFEALFTVYDDQVTFQLFKSFRVRINFSKPEAAARARI 105  
mouse PSATIACHLDPRVFDGLCRAKFESLFRTYDKDITFQYFKSFKRVRINFSNPLSAADARL 122  
rat FSSLIACVANGDVFSESETRAKFESLFRTYDKDITFQYFKSFKRVRINFSNPLSAADARL 69  
frog PTALIGCSLEPSVFYDGIYRTKFSLSFKAYDKEATFQYFKSFKRVRINFSNPISAAEARI 101  
zebrafish PTALFACSVHEAVFEDDRYRERFEALFRIYDDQTSFQMFKSFRVRISFSTPEAAARARI 104  
honeybee PTSVIVTNVDPRVFKSDELKHEIQDLFKQFGKDATFQYFRSFRMRVNYSSPNAANARI 124  
fly PLSIIVTNIHSEVFANPELKHAMEELFRTFSESATFQWLSFRRLRVNYDNAIAANARI 174  
worm PTNIIIVTQVPEEDVFNKQDKANFSSLFTQIEKDIHFDFLRSFRVRVIFSSPENATAAKL 88  
yeast DKCDIVDNDNVERIQVWLSKNILRKFQINENEPLQLIILKRFKRILLICPSHDISQHVMD 73

exon 6

human QLHKTEFL-GKEMKLYFAQTLHIG---SSHLAPPNDKQFLISPPASPP-VGWKQVED 177  
sheep QLHKTEFL-GKEMKLYFAQTLHIG---SSHLAPPNDKQFLISPPASPP-VGWKQVED 122  
cow ELHETQFR-GKLLKLYFAQVQTPETDGDKHLAPPQPAKQFLISPPASPP-VGWQPISD 126  
dog ELNETDFN-GKLLKLYFAQVQMSSETRDKSYLLPPQPVKQFLISPPASPP-VGWKQGED 162  
mouse RLHKTEFL-GKEMKLYFAQTLHIG---SSHLAPPNDKQFLISPPASPP-VGWKQVED 175  
rat QLHKTEFL-GKEMKLYFAQTLHIG---SSHLAPPNDKQFLISPPASPP-VGWKQVED 122  
frog QLHKSEFL-GKIKLYFAQTLHIG---SPLAPPNPEKQFLISPPSSPP-VGWKQKED 154  
zebrafish ELHESDFN-GTKLLKLYFAQVQNSGDDVDKAYLAPPQPVKQFLISPPASPP-VGWSQSED 161  
honeybee QLHQYTFHG-ETNINCYFAQVPTPI-DVEDQHLQPPALTKQFLISPPASPP-IGWEPREE 180  
fly KLHQYEFNKKITCYFAQVPTP---VSNKNLQPPAPVKQFLISPPASPP-AGWEPREE 229  
worm IVQGFSFK-GHELKAFFAQRIYMSAN--SQMLSPPLEKQFLISPPCSPP-VGWEQTKD 143  
yeast ASRALEME---NFNFYSYSLQDQQR-NLTQYLVKVPSEKMFISPPASPPPEFDFSKCED 129

exon 7

human ATP-VIN-YDLLYAI SKLGPGEKYELHAATDTTPSVVVHVCESDQE-KEEEEE-MERMRR 233  
sheep ATP-VIN-YDLLYAI SKLGPGEKYELHAATDTTPSVVVHVCESDQENEEBDE--MERMKR 178  
cow ATP-VLN-YDLLYAVAKLGPGEKYELHAGTESTPSVVVHVCDSDIEEBEDPKT-----S 178  
dog AMP-VIN-YDLLCAVSKLGPGEKYELHAGTESTPSVVVHVCESETEEBEETKN----- 213  
mouse ATP-VIN-YDLLYAI SKLGPGEKYELHAATDTTPSVVVHVCESDQENEBEEM--MERMKR 232  
rat ATP-VIN-YDLLYAI SKLGPGEKYELHAATDTTPSVVVHVCESDQEEEEEEEEEMERMKR 180  
frog ASP-VIN-YDLLYAI SKLGPGEQYELHAATDTTPSVVVHVCESDPENELIEEEDGMSK 212  
zebrafish ATP-VIN-YDLLCAVAKLGPGEKYELHAGTESTPSVVVHVCESETEEBEEM-- 211  
honeybee NEP-LVN-HDLLAAIANLSAGGSHELHPGGSGQPQIVVH---VCETTNPICKNV----- 228  
fly GEP-LVN-HDLLAALASLTGESHLEHPQSEDQPAIIVHTAMLAETGPGQVVK----- 280  
worm MPP-VVCFNFDMARLASFAIDKEYEVHNGDELTPAIIVHPCETPIDVPSAIEM----- 195  
yeast APQRHIQSHIQDQQRLEASQLLNNPDKNNNGTFTLLKSKVGAITIDRCPTNDGNGQM 189

human PKPKIIQTRRPEYT-----PIHLS--- 252  
sheep PKPKIIQTRRPEYT-----PIHLS--- 197  
cow PKPKIIQTRRPGPP-----PSVSN--- 197  
dog PKPKIIQTRRPEPPAAALS EPQNF DGAL 241  
mouse PKPKIIQTRRPEYT-----PIHLS--- 251  
rat PKPKIIQTRRPEYT-----PIHLS--- 199  
frog PKPKIIQTRRPEYM-----PIHLS--- 231  
zebrafish PKAKIVQTRRPDGP-----PKIYN--- 230  
honeybee --PRIQHTRCPEHS----- 240  
fly --APIVQTKCPERA----- 292  
worm --PRTPRPSSPCEQ----- 207  
yeast QLADHVKTAFPPKSFIDTDDDD----- 211
