# Supplementary material
Source: PubMed Central journal article supplement (PMC1201586)

**A**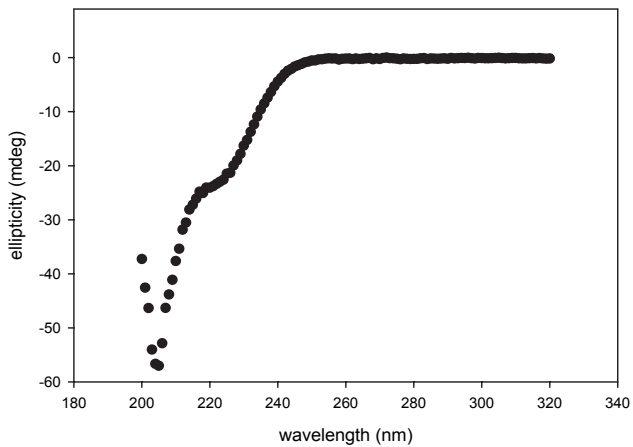**B**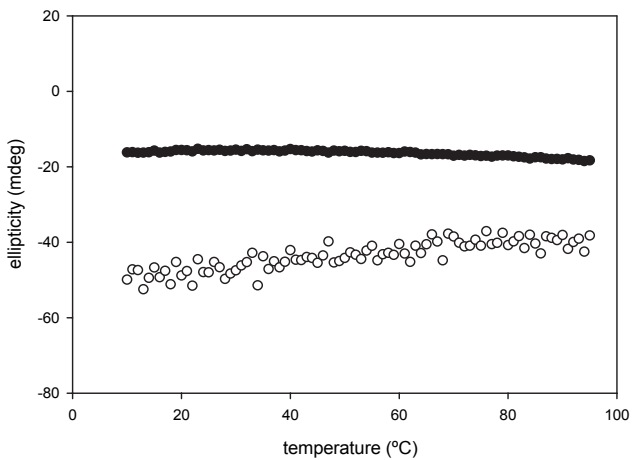

Supplement: pnas_0503846102_2.pdf [file pnas_0503846102_2.pdf]

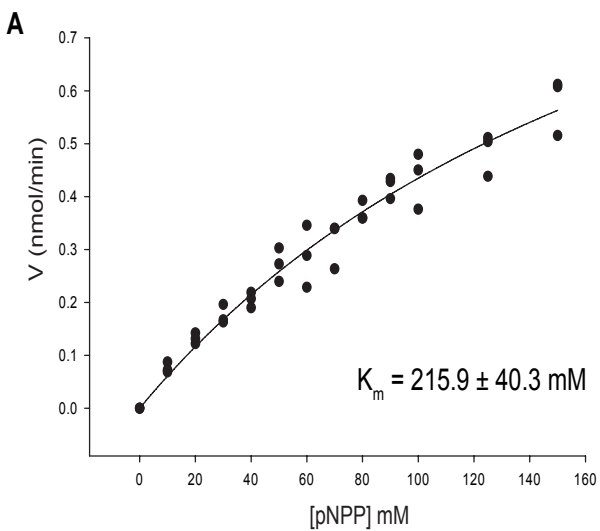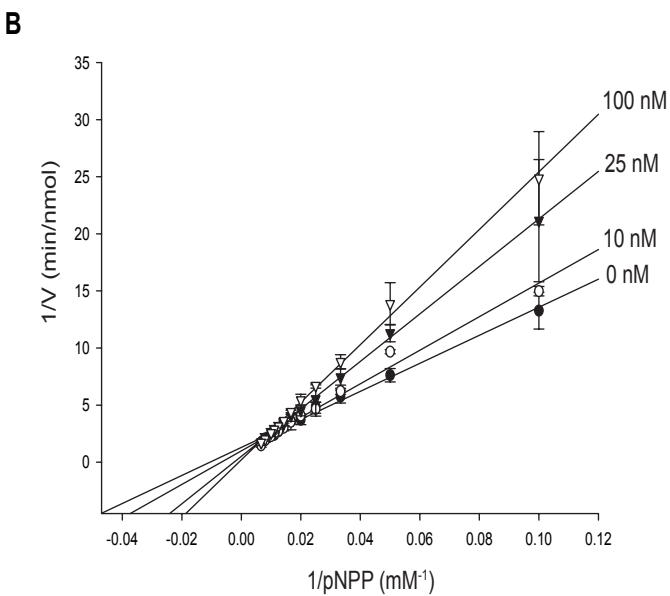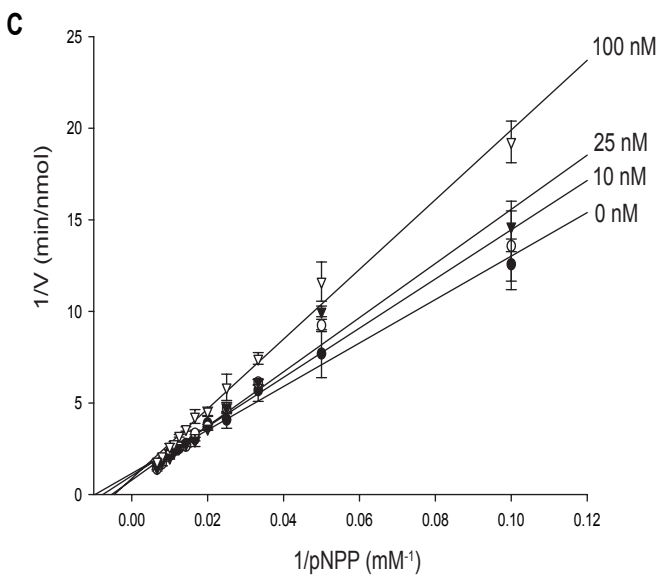

Supplement: pnas_0503846102_3.pdf [file pnas_0503846102_3.pdf]
